# Supplementary material
Source: ML conference proceedings conference paper supplement (https://aclanthology.org/D19-1183)
Supplement: Attachment [file D19-1183.Attachment.pdf]

## A Appendices

### A.1 MetaLWOz — dialogue examples

**Domain:** Ski

**User Task:** You want to know if there are good ski hills an hour's drive from your current location.

**Bot Task:** Tell the user that there are no ski hills in their immediate location.

**Bot** Hello how may I help you?

**User** Is there any good ski hills an hour's drive from my current location?

**Bot** I'm sorry to inform you that there are no ski hills in your immediate location

**User** Can you help me find the nearest?

**Bot** Absolutely! It looks like you're about 3 hours away from Bear Mountain. That seems to be the closest.

**User** Hmm.. sounds good

**Bot** Alright! I can help you get your lift tickets now!When will you be going?

**User** Awesome! please get me a ticket for 10pax

**Bot** You've got it. Anything else I can help you with?

**User** None. Thanks again!

**Bot** No problem!

**Domain:** Game rules

**User Task:** Ask how to win at the text adventure Zork. If the Bot cannot help you, ask them what games it can help you with.

**Bot Task:** Tell the user that you are programmed to help them play games, not win them. If the user starts talking about other games, go along with them and try to help.

**Bot** Hello how may I help you?

**User** I want to know how I can win playing Zork?

**Bot** I am programmed to help you play games, not win them

**User** What games can you help me with?

**Bot** Any game

**User** Can you specify a certain game?

**Bot** Zork

**User** What are the rules of Zork?

**Bot** You have to follow through a cave adventure

**User** What is the ending of the game?

**Bot** The user comes out of the cave

**Domain:** Music suggestion

**User Task:** Tell the bot that you like a certain genre of music, but don't prompt it to give you suggestions

**Bot Task:** Provide suggestions, even if the user

doesn't ask for them (or tells you they don't need any)

**Bot** Hello how may I help you?

**User** Hello. I like classic rock music.

**Bot** Dream on Aerosmith

**User** No, I'm not a huge fan of that song. Is there anything else available?

**Bot** Sweet Home Alabama

**User** Well, I do like Lynyrd Skynyrd, but that song is so cliché. Do you have anything else by the same band?

**Bot** Free bird

**User** Yes, that is the perfect song for how I am feeling right now!

**Bot** Great, Is there anything else?

**User** No, but I really appreciate your assistance. Thank you so much!

**Bot** You're welcome

**Domain:** Information retrieval

**User Task:** Describe a movie where these guys have to climb a mountain and then throw a thing into the mountain and ask the bot if they know what the movie is called.

**Bot Task:** Ask the user to elaborate as much as possible about the movie they are asking about, and then suggest they're thinking of Lord of the Rings.

**Bot** Hello how may I help you?

**User** I'm trying to remember this movie. Can you help?

**Bot** I would be happy to help. Can you tell me what it is about?

**User** In it these guys have to climb up a mountain. Then they throw something into the mountain.

**Bot** Do you know what genre the movie is, such as comedy, horror, sci-fi, or fantasy?

**User** Not sure about that.

**Bot** Do you any of the actor or character names in the movie?

**User** No... All I can remember is the stuff about the mountain.

**Bot** Is it a new movie, or an older movie?

**User** I don't know.

**Bot** It sounds like the movie you are talking about could be Lord of the Rings. Does that sound right?

**User** It could be that. Thanks for the help.

| Domain                       | #Dialogues | Domain               | #Dialogues |
|------------------------------|------------|----------------------|------------|
| UPDATE_CALENDAR              | 1991       | GUINNESS_CHECK       | 1886       |
| ALARM_SET                    | 1681       | SCAM_LOOKUP          | 1658       |
| PLAY_TIMES                   | 1601       | GAME_RULES           | 1590       |
| CONTACT_MANAGER              | 1483       | LIBRARY_REQUEST      | 1339       |
| INSURANCE                    | 1299       | HOME_BOT             | 1210       |
| HOW_TO_BASIC                 | 1086       | CITY_INFO            | 965        |
| TIME_ZONE                    | 951        | TOURISM              | 935        |
| SHOPPING                     | 903        | BUS_SCHEDULE_BOT     | 898        |
| CHECK_STATUS                 | 784        | WHAT_IS_IT           | 776        |
| STORE_DETAILS                | 737        | APPOINTMENT_REMINDER | 668        |
| PRESENT_IDEAS                | 664        | GEOGRAPHY            | 653        |
| SKI_BOT                      | 607        | MOVIE_LISTINGS       | 607        |
| UPDATE_CONTACT               | 581        | ORDER_PIZZA          | 577        |
| EDIT_PLAYLIST                | 574        | SPORTS_INFO          | 561        |
| BOOKING_FLIGHT               | 555        | WEATHER_CHECK        | 551        |
| EVENT_RESERVE                | 539        | RESTAURANT_PICKER    | 535        |
| LOOK_UP_INFO                 | 533        | AUTO_SORT            | 514        |
| QUOTE_OF_THE_DAY_BOT         | 513        | WEDDING_PLANNER      | 510        |
| MAKE_RESTAURANT_RESERVATIONS | 510        | AGREEMENT_BOT        | 507        |
| NAME_SUGGESTER               | 499        | APARTMENT_FINDER     | 499        |
| HOTEL_RESERVE                | 497        | PHONE_PLAN_BOT       | 496        |
| DECIDER_BOT                  | 487        | VACATION_IDEAS       | 486        |
| PHONE_SETTINGS               | 473        | POLICY_BOT           | 447        |
| PROMPT_GENERATOR             | 446        | MUSIC_SUGGESTER      | 445        |
| PET_ADVICE                   | 426        | BANK_BOT             | 367        |
| CATALOGUE_BOT                | 288        |                      |            |

Table 6: MetaLWOz dataset domains

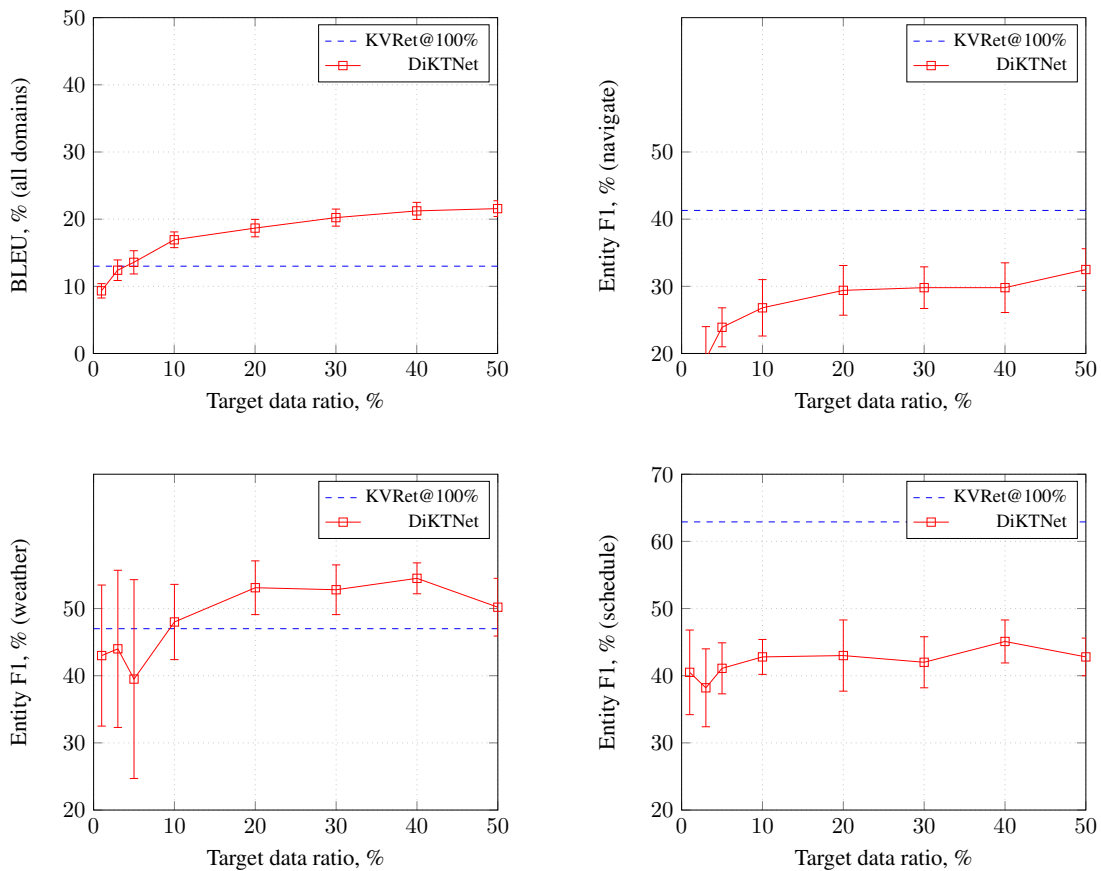

Figure 3: DiKNet performance with extended amounts of target data used for training
